# Supplementary material
Source: PubMed Central journal article supplement (PMC3228158)
Supplement: supp_the2010-0307_Online_Supplementary_Tables_A-E.pdf [file supp_the2010-0307_Online_Supplementary_Tables_A-E.pdf]

**Online Supplemental Table A. Sites of metastatic disease.**

| <b>Sites of metastatic disease</b> | <b>STn-KLH<br/>N = 521<br/>N (%)</b> | <b>Control<br/>N = 501<br/>N (%)</b> | <b>Total<br/>N = 1022<br/>N (%)</b> |
|------------------------------------|--------------------------------------|--------------------------------------|-------------------------------------|
| Bone                               | 333 (63.9%)                          | 294 (58.7%)                          | 627 (61.3%)                         |
| Liver                              | 211 (40.5%)                          | 221 (44.1%)                          | 432 (42.3%)                         |
| Lung                               | 170 (32.6%)                          | 175 (33.6%)                          | 345 (33.7%)                         |
| Lymph node                         | 139 (26.7%)                          | 158 (30.3%)                          | 297 (29.1%)                         |
| Pleural effusion                   | 77 (14.8%)                           | 84 (16.1%)                           | 161 (15.7%)                         |
| Other                              | 42 (8.1%)                            | 40 (7.7%)                            | 82 (8.0%)                           |
| Mediastinum                        | 42 (8.1%)                            | 46 (9.2%)                            | 88 (8.6%)                           |
| Soft tissue (not breast)           | 45 (8.6%)                            | 28 (5.4%)                            | 73 (7.1%)                           |
| Chest wall                         | 36 (6.9%)                            | 35 (6.7%)                            | 71 (6.9%)                           |
| Pleura                             | 36 (6.9%)                            | 30 (5.7%)                            | 66 (6.4%)                           |
| Skin                               | 36 (6.9%)                            | 28 (5.4%)                            | 64 (6.3%)                           |
| Right breast                       | 14 (2.7%)                            | 15 (3.02.9%)                         | 29 (2.8%)                           |
| Ascites                            | 17 (3.3%)                            | 11 (2.21%)                           | 28 (2.7%)                           |
| Left breast                        | 12 (2.3%)                            | 14 (2.7%)                            | 26 (2.5%)                           |
| CNS                                | 1 (0.2%)                             | 7 (1.3%)                             | 8 (0.8%)                            |
| Kidney                             | 1 (0.2%)                             | 2 (0.4%)                             | 3 (0.3%)                            |
| Unknown                            | 0                                    | 0                                    | 0                                   |

Some overlap of metastatic sites exists, as most patients had multiple sites of metastasis.

Note: There are no significant differences between treatment and control arms at an unadjusted  $\alpha = 0.05$ .

**Online Supplemental Table B. Patient dropouts due to adverse events.**

| <b>Associated adverse event</b>                        | <b>Day of discontinuation*<br/>(number of vaccinations)</b> |
|--------------------------------------------------------|-------------------------------------------------------------|
| Myelodysplastic syndrome not otherwise specified (NOS) | 562 (13)                                                    |
| Congestive cardiac failure                             | 28 (1)                                                      |
| Dry gangrene                                           | 32 (2)                                                      |
| Thrombocytopenic purpura                               | 119 (5)                                                     |
| Lung infiltration NOS                                  | 510 (11)                                                    |
| Angioneurotic edema                                    | 15 (1)                                                      |
| Injection site ulcer                                   | 111 (4)                                                     |
| Injection site reaction                                | 117 (5)                                                     |
| Hypotension NOS                                        | 15 (1)                                                      |
| Injection site ulceration                              | 89 (4)                                                      |
| Renal failure acute                                    | 160 (7)                                                     |
| Atrial fibrillation                                    | 1337 (21)                                                   |

\*Relative to baseline data

**Online Supplemental Table C. Ulceration characterization.**

| <b>Treatment group</b> | <b>Number of patients dosed</b> | <b>Incidence<br/><i>N</i> (%)</b> | <b>Mild<br/><i>N</i> (%)</b> | <b>Moderate<br/><i>N</i> (%)</b> | <b>Severe<br/><i>N</i> (%)</b> |
|------------------------|---------------------------------|-----------------------------------|------------------------------|----------------------------------|--------------------------------|
| STn-KLH                | 520                             | 91 (17.5)                         | 24 (4.6)                     | 52 (10.0)                        | 15 (2.9)                       |
| KLH                    | 500                             | 88 (17.6)                         | 27 (5.4)                     | 45 (9.0)                         | 16 (3.2)                       |

**Online Supplemental Table D. Safety data: Top 10 adverse events (all grades) by frequency.**

| <b>Adverse event</b>       | <b>STn-KLH</b> | <b>KLH</b> |
|----------------------------|----------------|------------|
| Nausea                     | 23.5%          | 24.6%      |
| Injection site ulcerations | 17.5%          | 17.6%      |
| Arthralgia                 | 16.6%          | 16.4%      |
| Fatigue                    | 15.5%          | 17.2%      |
| Headache                   | 13.8%          | 17.2%      |
| Back pain                  | 13.4%          | 15.0%      |
| Vomiting                   | 11.5%          | 13.9%      |
| Pyrexia                    | 11.5%          | 12.3%      |
| Cough                      | 10.7%          | 10.1%      |
| Bone pain                  | 9.8%           | 11.1%      |

**Online Supplemental Table E. Number of patients with various antibody titers at week 12.**

|     | STn-KLH<br>N=364                    |                                    |                                           | KLH<br>N=323                        |                                    |                                           |
|-----|-------------------------------------|------------------------------------|-------------------------------------------|-------------------------------------|------------------------------------|-------------------------------------------|
|     | Less than<br>median<br>( <i>n</i> ) | Equal to<br>median<br>( <i>n</i> ) | Greater<br>than<br>median<br>( <i>n</i> ) | Less than<br>median<br>( <i>n</i> ) | Equal to<br>median<br>( <i>n</i> ) | Greater<br>than<br>median<br>( <i>n</i> ) |
| OSM |                                     |                                    |                                           |                                     |                                    |                                           |
| IgM | 145                                 | 102                                | 120                                       | 0                                   | 128                                | 48                                        |
| IgG | 125                                 | 69                                 | 173                                       | 0                                   | 303                                | 23                                        |
| STn |                                     |                                    |                                           |                                     |                                    |                                           |
| IgM | 183                                 | 83                                 | 101                                       | 0                                   | 181                                | 145                                       |
| IgG | 157                                 | 104                                | 106                                       | 0                                   | 295                                | 31                                        |
| KLH |                                     |                                    |                                           |                                     |                                    |                                           |
| IgM | 106                                 | 82                                 | 179                                       | 129                                 | 66                                 | 131                                       |
| Igg | 159                                 | 99                                 | 109                                       | 122                                 | 73                                 | 131                                       |
